# Supplementary material for: Flexible solid-state Zn–air battery based on polymer-oxygen-functionalized g-C3N4 composite membrane
Source: Royal Society of Chemistry journal article supplement (doi:10.1039/d3nr05783f), 2024-01-01
Supplement: d3nr05783f1.pdf [file d3nr05783f1.pdf]

## Supplementary file

### Flexible solid-state Zn-Air battery based on polymer-oxygen functionalized g-C<sub>3</sub>N<sub>4</sub> composite membrane

Arkaj Singh, Ravinder Sharma, Aditi Halder\*

School of Chemical Sciences, Indian Institute of Technology Mandi, Himachal Pradesh 175005.

Corresponding author email: aditi@iitmandi.ac.in

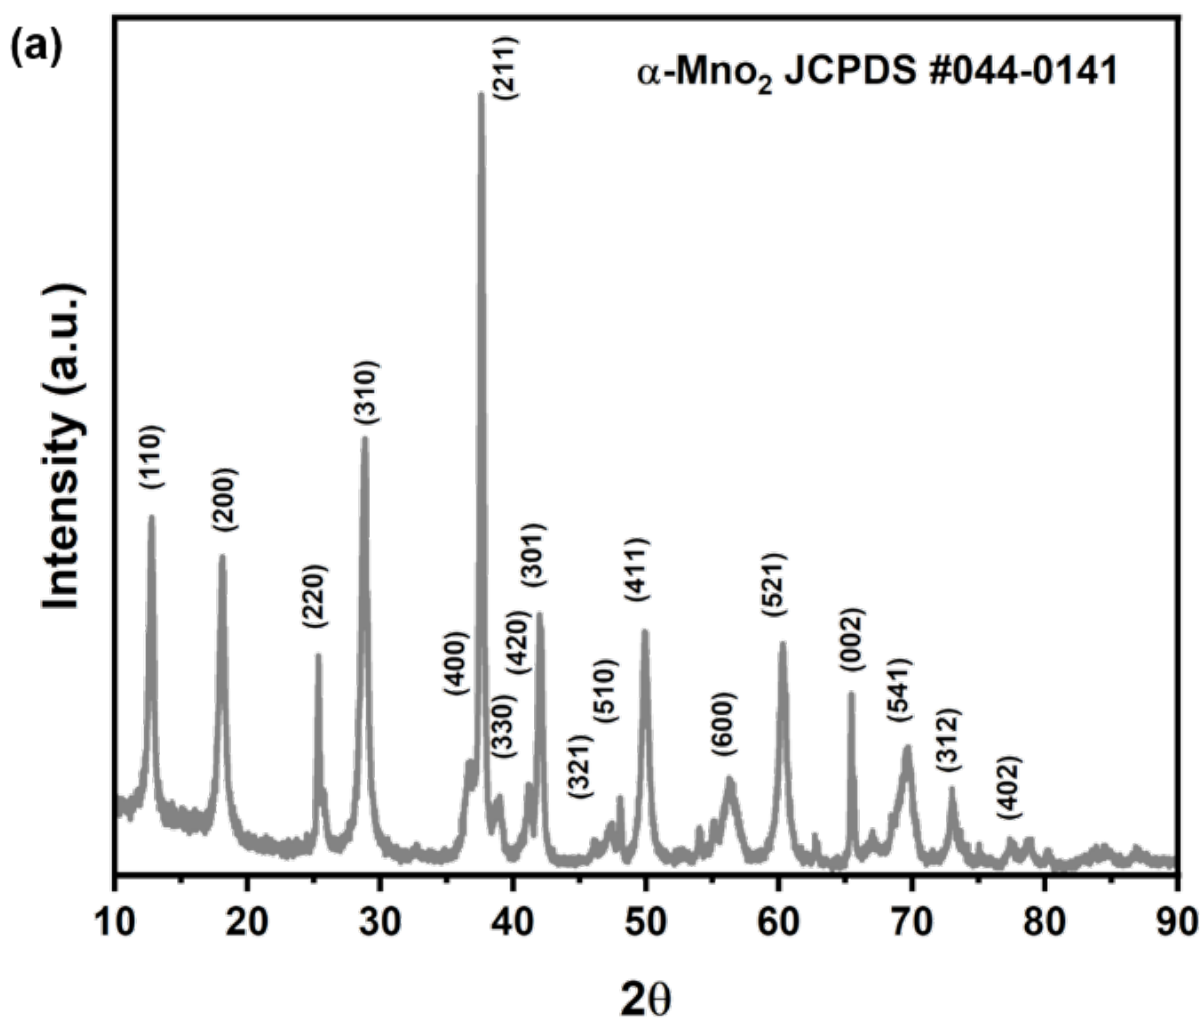

Figure 1. XRD pattern of MnO<sub>2</sub>

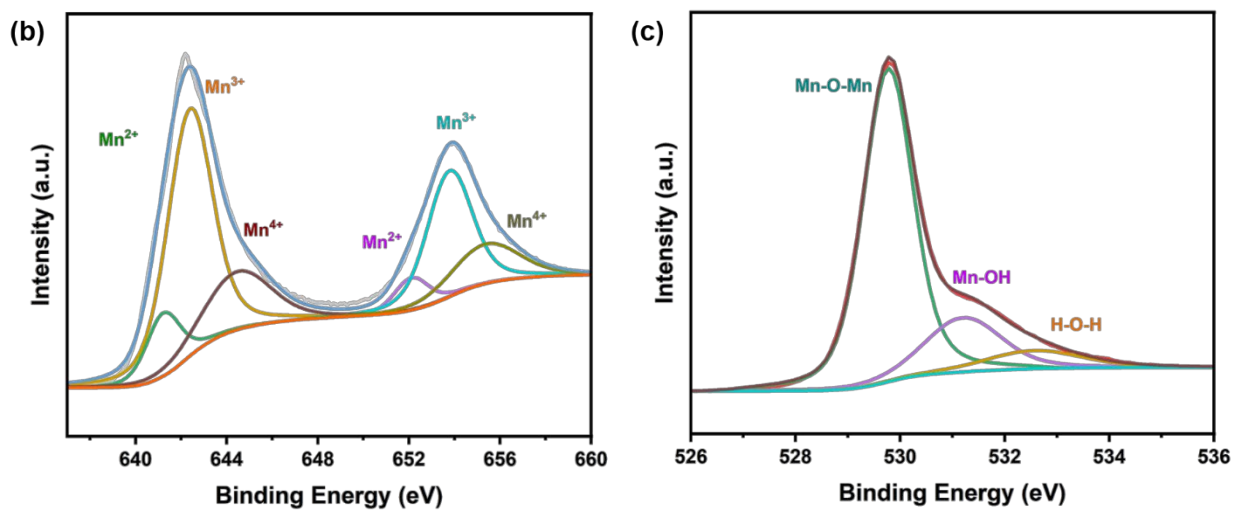

Figure 2. XPS plot of Mn and O present in MnO<sub>2</sub>

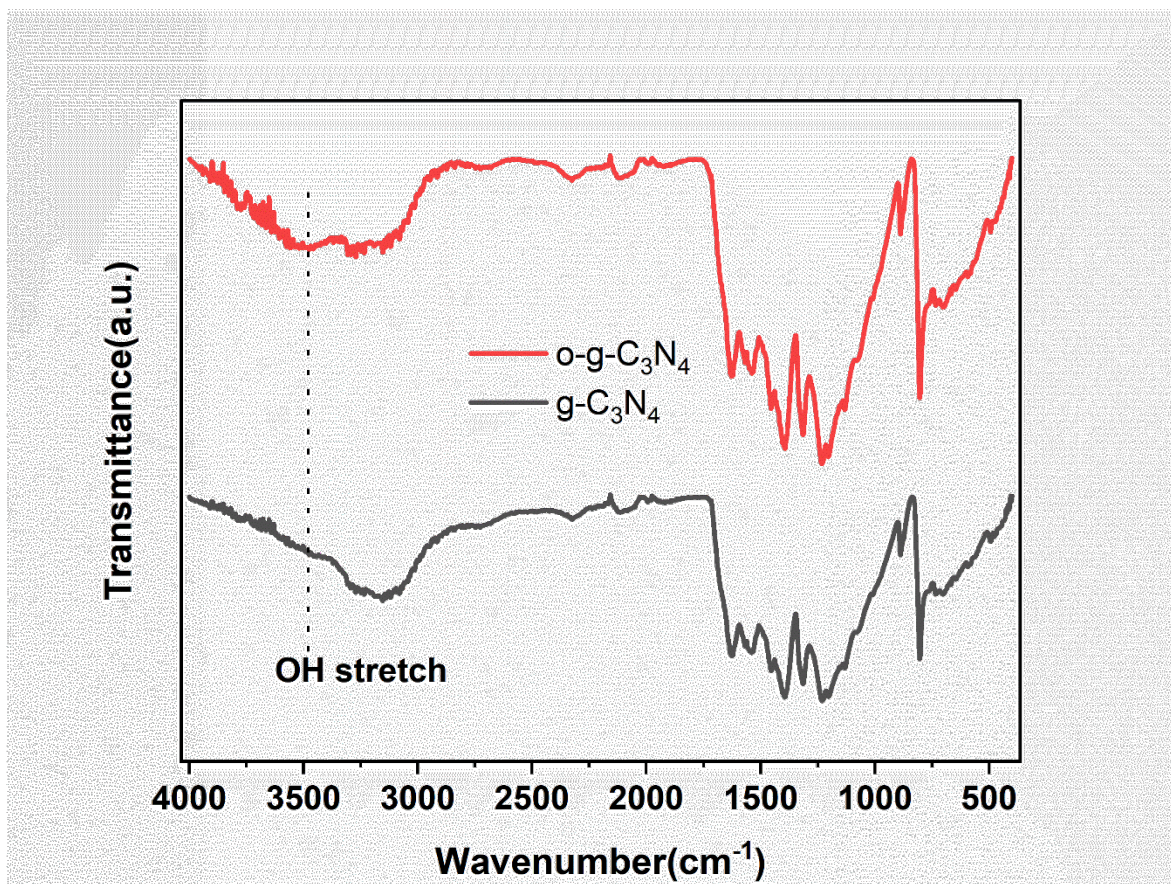

Figure 3. IR plot of g-C<sub>3</sub>N<sub>4</sub> and o-g-C<sub>3</sub>N<sub>4</sub>

### Conductivity data along with the value of resistance

Thickness – 0.55mm

Area – 3 cm<sup>2</sup>

Formula – Thickness/resistance\*area

Units for the conductivity- mScm<sup>-1</sup>

| Sr. No | PVA | 0.16 wt% | 0.32 wt% | 0.48 wt% | 0.64 wt% |
|--------|-----|----------|----------|----------|----------|
| 1      | 18  | 19       | 21       | 17       | 6        |
| 2      | 18  | 19       | 27       | 17       | 7        |
| 3      | 19  | 22       | 25       | 17       | 10       |

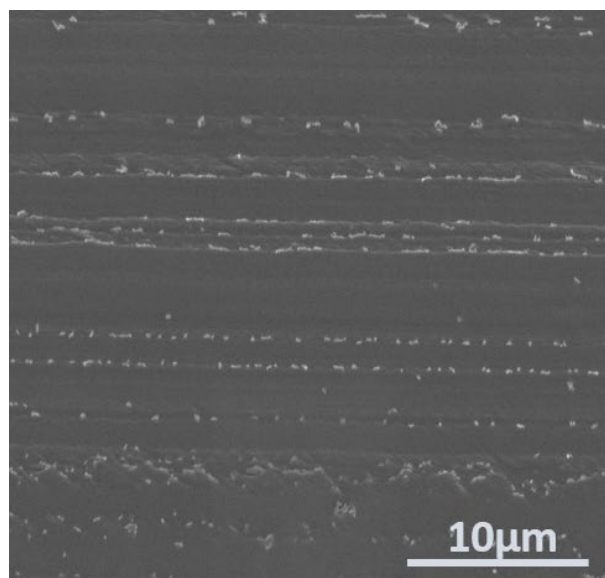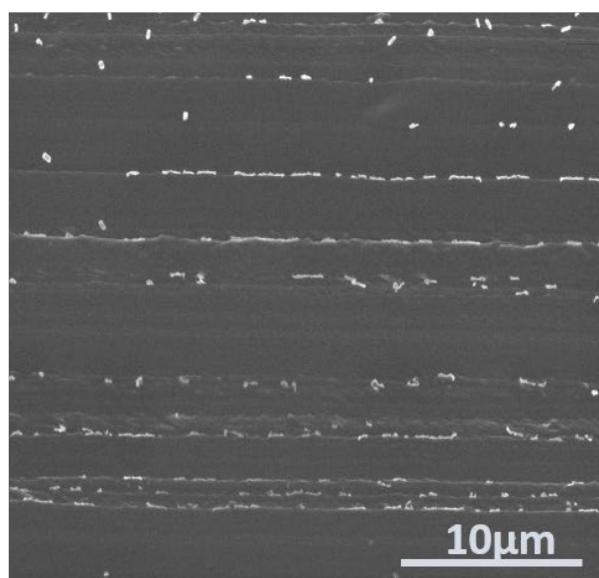

Figure 4. Cross-sectional SEM of the composite membrane

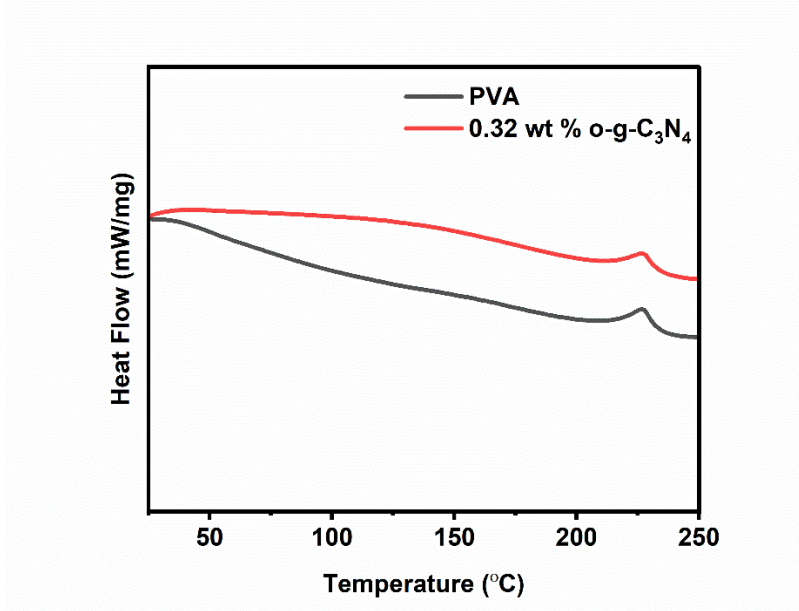

Figure 5. DSC curve of PVA and 0.32wt % o-g-C<sub>3</sub>N<sub>4</sub>@PVA

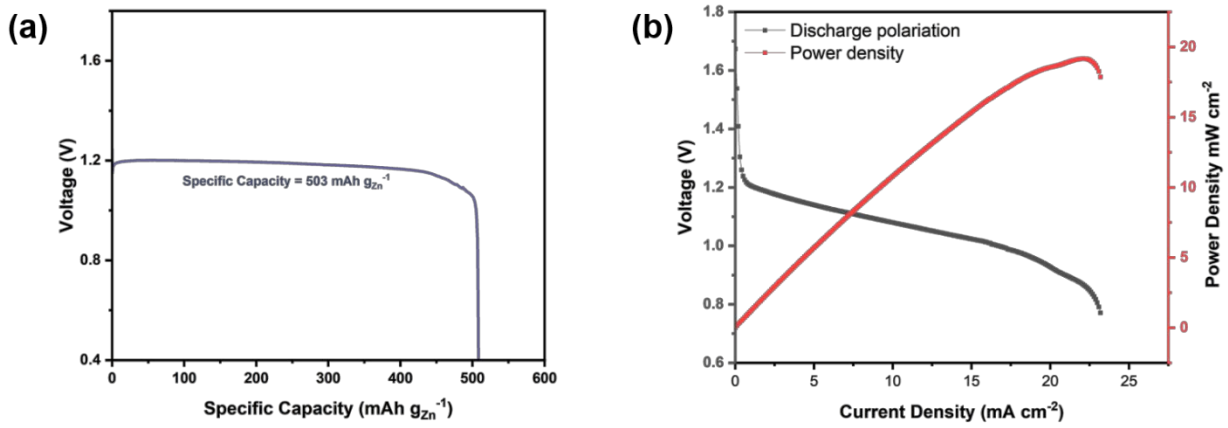

Figure 6. (a) Specific capacity measurements (b) Discharge polarisation and Power density plot (c) step discharge

Table for literature comparison of various gel polymer electrolytes for Zinc-air batteries.

| Material for membrane                                | Feature of the membrane                                                  | Electrolyte                                              | Device performance                                                                     | Reference |
|------------------------------------------------------|--------------------------------------------------------------------------|----------------------------------------------------------|----------------------------------------------------------------------------------------|-----------|
| 0.32 wt % o-g-C <sub>3</sub> N <sub>4</sub> /PVA     | Conductivity-27 mS cm <sup>-1</sup><br>Young's modulus-107.63 MPa        | 6M KOH                                                   | OCP - 1.48V<br>GCD stability-greater than 40 hours at 2mA/cm <sup>2</sup>              | This work |
| PVAA-Cellulose                                       | Conductivity- 123 mS cm <sup>-1</sup><br>Maximum tensile stress-0.87 MPa | KOH + Zn(Ac) <sub>2</sub>                                | OCP - 1.41V<br>GCD stability-53 hours                                                  | 1         |
| PANa-St-0.5                                          | Conductivity- 82 mS cm <sup>-1</sup><br>Tensile strength- 10.85 KPa      | 6M KOH                                                   | OCP - 1.40 V<br>GCD stability-70 hours                                                 | 2         |
| BC/PVA membrane                                      | Conductivity- 81.7 mS cm <sup>-1</sup><br>Tensile strength - 0.951 MPa   | 6.0 M KOH and 0.2 M Zn(CH <sub>3</sub> COO) <sub>2</sub> | OCP-1.35V<br>GCD stability-more than 400 hours at 0.5 current density                  | 3         |
| PAMPS-K/MC hydrogel                                  | Conductivity- 105 mS cm <sup>-1</sup>                                    | 5M KOH                                                   | OCP-1.35V<br>GCD stability-more than 70 cycles 40 hours.                               | 4         |
| Porous PVA-5 wt% SiO <sub>2</sub> nanocomposite GPEs | Conductivity -57.3 mS cm <sup>-1</sup><br>Maximum stress - 705 KPa       | 6M KOH                                                   | OCP- 2.54 V<br>two batteries connected in series.<br>GCD stability-more than 50 hours. | 5         |

1. Li, W.; Wang, Y.; Liu, R.; Chen, W.; Zhang, H.; Zhang, Z., Gel Polymer-Based Composite Solid-State Electrolyte for Long-Cycle-Life Rechargeable Zinc-Air Batteries. *ACS Sustainable Chemistry & Engineering* **2023**, *11* (9), 3732-3739.
2. Zhang, Y.; Chen, Y.; Alfred, M.; Huang, F.; Liao, S.; Chen, D.; Li, D.; Wei, Q., Alkaline sodium polyacrylate-starch hydrogels with tolerance to cold conditions for stretchable zinc-air batteries. *Composites Part B: Engineering* **2021**, *224*, 109228.
3. Zhao, N.; Wu, F.; Xing, Y.; Qu, W.; Chen, N.; Shang, Y.; Yan, M.; Li, Y.; Li, L.; Chen, R., Flexible hydrogel electrolyte with superior mechanical properties based on poly (vinyl alcohol) and bacterial cellulose for the solid-state zinc-air batteries. *ACS applied materials & interfaces* **2019**, *11* (17), 15537-15542.
4. Sun, N.; Lu, F.; Yu, Y.; Su, L.; Gao, X.; Zheng, L., Alkaline double-network hydrogels with high conductivities, superior mechanical performances, and antifreezing properties for solid-state zinc-air batteries. *ACS applied materials & interfaces* **2020**, *12* (10), 11778-11788.

5. Fan, X.; Liu, J.; Song, Z.; Han, X.; Deng, Y.; Zhong, C.; Hu, W., Porous nanocomposite gel polymer electrolyte with high ionic conductivity and superior electrolyte retention capability for long-cycle-life flexible zinc–air batteries. *Nano Energy* **2019**, *56*, 454-462.
